# Supplementary material
Source: PubMed Central journal article supplement (PMC6667567)
Supplement: 11606_2019_5060_MOESM1_ESM.pdf [file 11606_2019_5060_MOESM1_ESM.pdf]

1 **APPENDIX**

2

3 **Supplemental Table 1:** Questions assessing patient-reported access to 5 primary care services from the  
 4 2012 Survey of Healthcare Experiences of Patients (SHEP), PMCH Item set.

|                                                                                                       | <b>In the last 12 months, . . .</b>                                                                                                                            | <b>Response</b>                         |
|-------------------------------------------------------------------------------------------------------|----------------------------------------------------------------------------------------------------------------------------------------------------------------|-----------------------------------------|
| <b>Routine Care</b>                                                                                   | . . . did you make any appointments for a <b>check-up or routine care</b> with this provider?                                                                  | Yes<br>No (“not needed”)†               |
|                                                                                                       | . . . when you made an appointment for a <b>check-up or routine care</b> with this provider, how often did you get an appointment as soon as you needed?       | Never<br>Sometimes<br>Usually<br>Always |
| <b>Care by phone regular hours</b>                                                                    | . . . did you phone this provider’s office with a <b>medical question during regular office hours?</b>                                                         | Yes<br>No (“not needed”)†               |
|                                                                                                       | . . . when you phoned this provider’s office during regular office hours, how often did you get an answer to your medical question that same day?              | Never<br>Sometimes<br>Usually<br>Always |
| <b>Immediate Care</b>                                                                                 | . . . did you phone this provider’s office to get an appointment for an illness, injury or condition that needed <b>care right away?</b>                       | Yes<br>No (“not needed”)†               |
|                                                                                                       | . . . when you phoned this provider’s office to get an appointment for care you needed right away, how often did you get an appointment as soon as you needed? | Never<br>Sometimes<br>Usually<br>Always |
| <b>After-hours Care</b>                                                                               | . . . did you need care for yourself <b>during evenings, weekends, or holidays?</b>                                                                            | Yes<br>No (“not needed”)†               |
|                                                                                                       | how often were you able to get the care you needed from this provider’s office <b>during evenings, weekends, or holidays?</b>                                  | Never<br>Sometimes<br>Usually<br>Always |
| <b>Care by phone afterhours</b>                                                                       | . . . did you phone this provider’s office with a <b>medical question after regular office hours?</b>                                                          | Yes<br>No (“not needed”)†               |
|                                                                                                       | . . . when you phoned this provider’s office after regular office hours, how often did you get an answer to your medical question as soon as you needed?       | Never<br>Sometimes<br>Usually<br>Always |
| †Denial responses to contingent question maintain in cohort as “not needed” category in all analyses; |                                                                                                                                                                |                                         |

5

6

7 **Supplemental Table 2:** Experiences with 5 service types among patients with or without any  
 8 hospitalization due to acute or chronic conditions

|                                       |            | All    |      | Acute ACSCs |       |                      | Chronic ACSCs |        |                      |
|---------------------------------------|------------|--------|------|-------------|-------|----------------------|---------------|--------|----------------------|
|                                       |            | N =    |      | Yes         | No    | p value <sup>†</sup> | Yes           | No     | p value <sup>†</sup> |
| <b>Routine care</b>                   | N =        | 67,549 | 784  | 66,765      |       | 1,266                | 66,283        |        |                      |
|                                       | Never (%)  | 4.4    | 1.9  | 4.4         | 0.084 | 2.9                  | 4.4           | 0.082  |                      |
|                                       | Sometimes  | 8.7    | 7.6  | 8.7         |       | 7.8                  | 8.7           |        |                      |
|                                       | Usually    | 22.3   | 26.3 | 22.2        |       | 25.3                 | 22.2          |        |                      |
|                                       | Always     | 42.5   | 41.2 | 42.5        |       | 40.6                 | 42.5          |        |                      |
|                                       | Not Needed | 22.2   | 23.0 | 22.2        |       | 23.5                 | 22.2          |        |                      |
| <b>Care by phone<br/>Office Hours</b> | N =        | 68,016 | 789  | 67,227      |       | 1,280                | 66,736        |        |                      |
|                                       | Never (%)  | 5.5    | 4.0  | 5.5         | 0.548 | 3.6                  | 5.5           | 0.017  |                      |
|                                       | Sometimes  | 7.8    | 9.5  | 7.8         |       | 8.4                  | 7.8           |        |                      |
|                                       | Usually    | 13.0   | 13.9 | 12.9        |       | 15.5                 | 12.9          |        |                      |
|                                       | Always     | 23.3   | 24.1 | 23.3        |       | 26.6                 | 23.3          |        |                      |
|                                       | Not Needed | 50.4   | 48.4 | 50.5        |       | 45.9                 | 50.5          |        |                      |
| <b>Immediate Care</b>                 | N =        | 67,954 | 781  | 67,173      |       | 1,278                | 66,676        |        |                      |
|                                       | Never (%)  | 5.0    | 2.7  | 5.0         | 0.002 | 4.4                  | 5.0           | 0.309  |                      |
|                                       | Sometimes  | 7.0    | 4.3  | 7.1         |       | 9.1                  | 7.0           |        |                      |
|                                       | Usually    | 11.4   | 12.6 | 11.4        |       | 12.9                 | 11.3          |        |                      |
|                                       | Always     | 20.3   | 16.4 | 20.4        |       | 20.2                 | 20.3          |        |                      |
|                                       | Not Needed | 56.3   | 64.1 | 56.2        |       | 53.4                 | 56.3          |        |                      |
| <b>After-Hours Care</b>               | N =        | 67,098 | 771  | 66,327      |       | 1,247                | 65,851        |        |                      |
|                                       | Never (%)  | 15.5   | 16.4 | 15.5        | 0.077 | 23.5                 | 15.4          | <0.001 |                      |
|                                       | Sometimes  | 2.5    | 1.7  | 2.5         |       | 3.2                  | 2.5           |        |                      |
|                                       | Usually    | 2.5    | 3.1  | 2.5         |       | 5.0                  | 2.5           |        |                      |
|                                       | Always     | 5.3    | 8.8  | 5.2         |       | 6.0                  | 5.2           |        |                      |
|                                       | Not Needed | 74.2   | 70.1 | 74.2        |       | 62.2                 | 74.4          |        |                      |
| <b>Care by phone<br/>Afterhours</b>   | N =        | 67,461 | 777  | 66,684      |       | 1,253                | 66,208        |        |                      |
|                                       | Never (%)  | 2.1    | 1.5  | 2.1         | 0.220 | 2.3                  | 2.1           | 0.803  |                      |
|                                       | Sometimes  | 1.3    | 2.1  | 1.3         |       | 1.6                  | 1.3           |        |                      |
|                                       | Usually    | 1.7    | 3.5  | 1.7         |       | 1.4                  | 1.7           |        |                      |
|                                       | Always     | 3.1    | 3.6  | 3.1         |       | 2.5                  | 3.1           |        |                      |
|                                       | Not Needed | 91.8   | 89.2 | 91.8        |       | 92.2                 | 91.8          |        |                      |

Questions for each service type and responses are listed in Supplemental Table 1; \*ACSC, Ambulatory Care Sensitive Conditions; All the responses weighted to national VHA population in FY 2012; †Pearson chi-squared test

9

10

11

12 **Supplemental Table 3:** Association of patient-reported access to PCMH-related primary care services in  
 13 2012 and any hospitalization due to Ambulatory Care Sensitive Condition (H-ACSC) in 2013

|                                        |            | <b>Overall H-ACSC<sup>†</sup></b> | <b>Acute H-ACSC<sup>†</sup></b> | <b>Chronic H-ACSC<sup>†</sup></b> |
|----------------------------------------|------------|-----------------------------------|---------------------------------|-----------------------------------|
| <b>Routine care</b>                    | N =        | 67,549                            | 67,549                          | 67,549                            |
|                                        | Never      | <i>Ref</i>                        | <i>Ref</i>                      | <i>Ref</i>                        |
|                                        | Sometimes  | 1.26 (0.86-1.85)                  | 1.56 (0.83-2.93)                | 1.21 (0.78-1.86)                  |
|                                        | Usually    | 1.31 (0.92-1.87)                  | 1.65 (0.92-2.96)                | 1.19 (0.79-1.82)                  |
|                                        | Always     | 1.04 (0.75-1.45)                  | 1.26 (0.72-2.22)                | 1.00 (0.67-1.49)                  |
|                                        | Not Needed | 1.09 (0.77-1.55)                  | 1.26 (0.70-2.25)                | 1.06 (0.70-1.61)                  |
| <b>Care by phone<br/>Regular Hours</b> | N =        | 68,016                            | 68,016                          | 68,016                            |
|                                        | Never      | <i>Ref</i>                        | <i>Ref</i>                      | <i>Ref</i>                        |
|                                        | Sometimes  | 1.38 (0.94-2.02)                  | 1.42 (0.82-2.45)                | 1.39 (0.90-2.16)                  |
|                                        | Usually    | 1.28 (0.93-1.76)                  | 1.07 (0.65-1.77)                | 1.49 (1.03-2.17)*                 |
|                                        | Always     | 1.17 (0.87-1.57)                  | 1.01 (0.64-1.58)                | 1.35 (0.95-1.93)                  |
|                                        | Not Needed | 1.02 (0.78-1.35)                  | 0.91 (0.60-1.38)                | 1.14 (0.82-1.59)                  |
| <b>Immediate Care</b>                  | N =        | 67,884                            | 67,954                          | 67,884                            |
|                                        | Never      | <i>Ref</i>                        | <i>Ref</i>                      | <i>Ref</i>                        |
|                                        | Sometimes  | 1.22 (0.76-1.97)                  | 1.02 (0.58-1.80)                | 1.36 (0.78-2.37)                  |
|                                        | Usually    | 1.10 (0.71-1.70)                  | 1.55 (0.89-2.68)                | 0.94 (0.56-1.58)                  |
|                                        | Always     | 0.80 (0.53-1.21)                  | 1.05 (0.63-1.75)                | 0.77 (0.47-1.28)                  |
|                                        | Not Needed | 0.90 (0.61-1.35)                  | 1.37 (0.84-2.23)                | 0.77 (0.48-1.24)                  |
| <b>After-hours Care</b>                | N =        | 67,098                            | 67,098                          | 67,098                            |
|                                        | Never      | <i>Ref</i>                        | <i>Ref</i>                      | <i>Ref</i>                        |
|                                        | Sometimes  | 0.73 (0.50-1.05)                  | 0.72 (0.37-1.40)                | 0.77 (0.50-1.18)                  |
|                                        | Usually    | 0.92 (0.63-1.33)                  | 0.96 (0.58-1.58)                | 0.94 (0.60-1.49)                  |
|                                        | Always     | 0.86 (0.59-1.25)                  | 1.47 (0.77-2.81)                | 0.62 (0.44-0.89)**                |
|                                        | Not Needed | 0.56 (0.47-0.68)***               | 0.76 (0.57-1.01)                | 0.50 (0.40-0.63)***               |
| <b>Care by Phone<br/>Afterhours</b>    | N =        | 67,461                            | 67,461                          | 67,461                            |
|                                        | Never      | <i>Ref</i>                        | <i>Ref</i>                      | <i>Ref</i>                        |
|                                        | Sometimes  | 1.10 (0.43-2.82)                  | 1.82 (0.76-4.35)                | 0.82 (0.22-3.02)                  |
|                                        | Usually    | 1.23 (0.52-2.93)                  | 2.15 (0.71-6.51)                | 0.67 (0.28-1.61)                  |
|                                        | Always     | 0.68 (0.30-1.53)                  | 1.09 (0.36-3.26)                | 0.51 (0.22-1.20)                  |
|                                        | Not Needed | 0.76 (0.41-1.42)                  | 0.83 (0.42-1.65)                | 0.73 (0.34-1.54)                  |

<sup>†</sup>Defined by AHRQ Quality Indicators, version 4.5, for overall, acute, and chronic H-ACSC; Columns represent multivariable logistic regression testing association expressed in Odds Ratios with patient-reported access with 5 different primary care service types with overall, acute, and chronic H-ACSC; All models weighted to national VHA population in FY 2012; \*p<0.05, \*\*p<0.01, \*\*\*p<0.001

14  
15

16 **Supplemental table 4.1:** Association of patient-reported access to 5 primary care services types and  
 17 hospitalization due to Ambulatory Care Sensitive Conditions (H-ACSCs) for patients **65 years old or older**

|                                       |            | <b>Overall H-ACSCs</b> | <b>Acute H-ACSCs</b> | <b>Chronic H-ACSCs</b> |
|---------------------------------------|------------|------------------------|----------------------|------------------------|
| <b>Routine care</b>                   | N =        | 39,192                 | 39,192               | 39,192                 |
|                                       | Never      | <i>Ref</i>             | <i>Ref</i>           | <i>Ref</i>             |
|                                       | Sometimes  | 1.27 (0.81-2.00)       | 2.20 (1.07-4.50)*    | 0.96 (0.57-1.62)       |
|                                       | Usually    | 1.19 (0.80-1.78)       | 1.74 (0.92-3.30)     | 0.98 (0.61-1.58)       |
|                                       | Always     | 0.98 (0.67-1.44)       | 1.41 (0.76-2.60)     | 0.83 (0.53-1.31)       |
|                                       | Not Needed | 1.00 (0.68-1.46)       | 1.45 (0.77-2.73)     | 0.82 (0.52-1.29)       |
| <b>Care by phone<br/>Office Hours</b> | N =        | 39,487                 | 39,487               | 39,487                 |
|                                       | Never      | <i>Ref</i>             | <i>Ref</i>           | <i>Ref</i>             |
|                                       | Sometimes  | 1.43 (0.89-2.30)       | 1.93 (1.03-3.61)*    | 1.14 (0.61-2.11)       |
|                                       | Usually    | 1.07 (0.77-1.48)       | 0.96 (0.57-1.62)     | 1.24 (0.83-1.85)       |
|                                       | Always     | 1.03 (0.73-1.45)       | 1.12 (0.66-1.89)     | 1.03 (0.70-1.53)       |
|                                       | Not Needed | 1.00 (0.73-1.37)       | 1.06 (0.66-1.71)     | 1.00 (0.69-1.46)       |
| <b>Immediate Care</b>                 | N =        | 39,431                 | 39,431               | 39,431                 |
|                                       | Never      | <i>Ref</i>             | <i>Ref</i>           | <i>Ref</i>             |
|                                       | Sometimes  | 1.46 (0.85-2.49)       | 1.26 (0.63-2.55)     | 1.55 (0.84-2.85)       |
|                                       | Usually    | 1.53 (0.96-2.43)       | 1.79 (0.90-3.58)     | 1.31 (0.77-2.23)       |
|                                       | Always     | 0.95 (0.64-1.40)       | 1.11 (0.59-2.08)     | 0.91 (0.57-1.43)       |
|                                       | Not Needed | 1.16 (0.79-1.69)       | 1.52 (0.85-2.71)     | 0.98 (0.63-1.52)       |
| <b>After-Hours Care</b>               | N =        | 38,895                 | 38,895               | 38,895                 |
|                                       | Never      | <i>Ref</i>             | <i>Ref</i>           | <i>Ref</i>             |
|                                       | Sometimes  | 0.72 (0.46-1.14)       | 0.86 (0.42-1.79)     | 0.72 (0.43-1.21)       |
|                                       | Usually    | 1.17 (0.74-1.84)       | 1.06 (0.65-1.72)     | 1.20 (0.67-2.13)       |
|                                       | Always     | 0.87 (0.55-1.38)       | 1.51 (0.75-3.01)     | 0.58 (0.38-0.87)**     |
|                                       | Not Needed | 0.70 (0.57-0.86)***    | 0.89 (0.67-1.17)     | 0.61 (0.48-0.79)***    |
| <b>Care by Phone<br/>Afterhours</b>   | N =        | 39,063                 | 39,063               | 39,063                 |
|                                       | Never      | <i>Ref</i>             | <i>Ref</i>           | <i>Ref</i>             |
|                                       | Sometimes  | 1.46 (0.34-6.20)       | 3.02 (0.91-10.04)    | 1.18 (0.22-6.45)       |
|                                       | Usually    | 0.95 (0.31-2.91)       | 2.31 (0.68-7.80)     | 0.65 (0.17-2.47)       |
|                                       | Always     | 0.73 (0.19-2.82)       | 2.63 (0.63-11.01)    | 0.35 (0.09-1.36)       |
|                                       | Not Needed | 0.85 (0.28-2.55)       | 1.84 (0.76-5.13)     | 0.65 (0.20-2.16)       |

\*p<0.05; \*\*p<0.05; \*\*\*p<0.001

18  
19

20 **Supplemental table 4.2:** Association of patient-reported access to 5 primary care services types and  
 21 hospitalization due to Ambulatory Care Sensitive Conditions (H-ACSCs), controlling for patient-reported  
 22 provider rating (satisfaction)

|                                       |            | Overall H-ACSCs            | Acute H-ACSCs    | Chronic H-ACSCs            |
|---------------------------------------|------------|----------------------------|------------------|----------------------------|
| <b>Routine care</b>                   | N =        | 66,486                     | 66,486           | 66,486                     |
|                                       | Never      | <i>Ref</i>                 | <i>Ref</i>       | <i>Ref</i>                 |
|                                       | Sometimes  | 1.28 (0.87-1.89)           | 1.53 (0.82-2.86) | 1.25 (0.79-1.98)           |
|                                       | Usually    | 1.37 (0.93-2.01)           | 1.58 (0.88-2.85) | 1.32 (0.82-2.11)           |
|                                       | Always     | 1.13 (0.78-1.65)           | 1.23 (0.67-2.25) | 1.19 (0.74-1.90)           |
|                                       | Not Needed | 1.14 (0.77-1.68)           | 1.22 (0.68-2.19) | 1.19 (0.73-1.93)           |
| <b>Care by phone<br/>Office Hours</b> | N =        | 66,943                     | 66,943           | 66,943                     |
|                                       | Never      | <i>Ref</i>                 | <i>Ref</i>       | <i>Ref</i>                 |
|                                       | Sometimes  | 1.47 (0.99-2.18)           | 1.40 (0.83-2.38) | 1.56 (1.00-2.44)           |
|                                       | Usually    | 1.40 (0.99-1.99)           | 1.00 (0.60-1.67) | <b>1.77 (1.17-2.69)**</b>  |
|                                       | Always     | 1.36 (0.96-1.94)           | 0.99 (0.60-1.62) | <b>1.79 (1.15-2.77)**</b>  |
|                                       | Not Needed | 1.15 (0.85-1.56)           | 0.89 (0.58-1.36) | 1.41 (0.98-2.03)           |
| <b>Immediate Care</b>                 | N =        | 66,832                     | 66,832           | 66,832                     |
|                                       | Never      | <i>Ref</i>                 | <i>Ref</i>       | <i>Ref</i>                 |
|                                       | Sometimes  | 1.24 (0.76-2.02)           | 1.05 (0.60-1.85) | 1.38 (0.77-2.47)           |
|                                       | Usually    | 1.13 (0.72-1.78)           | 1.58 (0.91-2.77) | 0.98 (0.57-1.70)           |
|                                       | Always     | 0.81 (0.52-1.27)           | 1.00 (0.58-1.72) | 0.81 (0.47-1.40)           |
|                                       | Not Needed | 0.93 (0.61-1.42)           | 1.39 (0.84-2.29) | 0.81 (0.49-1.35)           |
| <b>After-hours Care</b>               | N =        | 66,043                     | 66,043           | 66,043                     |
|                                       | Never      | <i>Ref</i>                 | <i>Ref</i>       | <i>Ref</i>                 |
|                                       | Sometimes  | 0.77 (0.54-1.11)           | 0.75 (0.39-1.45) | 0.82 (0.54-1.25)           |
|                                       | Usually    | 0.92 (0.63-1.33)           | 0.92 (0.56-1.53) | 0.96 (0.61-1.51)           |
|                                       | Always     | 0.86 (0.58-1.27)           | 1.49 (0.76-2.95) | <b>0.62 (0.44-0.87)**</b>  |
|                                       | Not Needed | <b>0.57 (0.47-0.68)***</b> | 0.76 (0.56-1.04) | <b>0.50 (0.41-0.62)***</b> |
| <b>Care by Phone<br/>Afterhours</b>   | N =        | 66,408                     | 66,408           | 66,408                     |
|                                       | Never      | <i>Ref</i>                 | <i>Ref</i>       | <i>Ref</i>                 |
|                                       | Sometimes  | 1.13 (0.44-2.91)           | 1.73 (0.72-4.18) | 0.90 (0.25-3.27)           |
|                                       | Usually    | 1.30 (0.55-3.10)           | 2.15 (0.71-6.47) | 0.73 (0.31-1.73)           |
|                                       | Always     | 0.73 (0.33-1.64)           | 1.09 (0.36-3.29) | 0.58 (0.25-1.34)           |
|                                       | Not Needed | 0.80 (0.43-1.47)           | 0.82 (0.41-1.63) | 0.80 (0.38-1.66)           |

\*p<0.05; \*\*p<0.05; \*\*\*p<0.001

25 **Supplemental Table 4.3:** Association of experiences with 5 ways to access care in 2012 and  
 26 hospitalization due to Ambulatory Care Sensitive Conditions (H-ACSC) in 2013 among Veterans enrolled  
 27 into Fee-for-service Medicare

|                                        |            | <b>Overall H-ACSC<sup>†</sup></b> | <b>Acute H-ACSC<sup>†</sup></b> | <b>Chronic H-ACSC<sup>†</sup></b> |
|----------------------------------------|------------|-----------------------------------|---------------------------------|-----------------------------------|
| <b>Routine care</b>                    | N =        | 56,160                            | 56,160                          | 56,160                            |
|                                        | Never      | <i>Ref</i>                        | <i>Ref</i>                      | <i>Ref</i>                        |
|                                        | Sometimes  | 1.36 (0.88-2.09)                  | 1.81 (0.92-3.57)                | 1.23 (0.75-2.00)                  |
|                                        | Usually    | 1.41 (0.97-2.06)                  | 1.85 (0.99-3.44)                | 1.25 (0.80-1.95)                  |
|                                        | Always     | 1.10 (0.77-1.56)                  | 1.34 (0.74-2.43)                | 1.04 (0.68-1.59)                  |
|                                        | Not Needed | 1.17 (0.81-1.69)                  | 1.37 (0.75-2.53)                | 1.12 (0.72-1.75)                  |
| <b>Care by phone<br/>Regular Hours</b> | N =        | 56,502                            | 56,502                          | 56,502                            |
|                                        | Never      | <i>Ref</i>                        | <i>Ref</i>                      | <i>Ref</i>                        |
|                                        | Sometimes  | 1.40 (0.92-2.13)                  | 1.30 (0.77-2.19)                | 1.54 (0.92-2.56)                  |
|                                        | Usually    | 1.31 (0.93-1.86)                  | 1.07 (0.63-1.82)                | 1.57 (1.05-2.35)*                 |
|                                        | Always     | 1.24 (0.89-1.73)                  | 1.03 (0.64-1.66)                | 1.46 (0.97-2.19)                  |
|                                        | Not Needed | 1.10 (0.81-1.50)                  | 0.92 (0.60-1.42)                | 1.28 (0.88-1.85)                  |
| <b>Immediate Care</b>                  | N =        | 56,477                            | 56,477                          | 56,477                            |
|                                        | Never      | <i>Ref</i>                        | <i>Ref</i>                      | <i>Ref</i>                        |
|                                        | Sometimes  | 1.53 (0.96-2.44)                  | 1.12 (0.62-2.03)                | 1.83 (1.03-3.18)*                 |
|                                        | Usually    | 1.34 (0.88-2.04)                  | 1.58 (0.87-2.88)                | 1.25 (0.76-2.07)                  |
|                                        | Always     | 1.00 (0.69-1.43)                  | 1.08 (0.63-1.86)                | 1.05 (0.67-1.65)                  |
|                                        | Not Needed | 1.13 (0.79-1.63)                  | 1.41 (0.83-2.39)                | 1.06 (0.69-1.63)                  |
| <b>After-hours Care</b>                | N =        | 55,736                            | 55,736                          | 55,736                            |
|                                        | Never      | <i>Ref</i>                        | <i>Ref</i>                      | <i>Ref</i>                        |
|                                        | Sometimes  | 0.71 (0.46-1.09)                  | 0.71 (0.34-1.46)                | 0.74 (0.45-1.22)                  |
|                                        | Usually    | 0.88 (0.61-1.25)                  | 1.07 (0.63-1.82)                | 0.85 (0.56-1.30)                  |
|                                        | Always     | 0.92 (0.61-1.39)                  | 1.56 (0.77-3.12)                | 0.66 (0.46-0.96)*                 |
|                                        | Not Needed | 0.59 (0.48-0.71)***               | 0.73 (0.54-0.98)*               | 0.53 (0.42-0.68)***               |
| <b>Care by Phone<br/>Afterhours</b>    | N =        | 56,049                            | 56,049                          | 56,049                            |
|                                        | Never      | <i>Ref</i>                        | <i>Ref</i>                      | <i>Ref</i>                        |
|                                        | Sometimes  | 1.07 (0.38-3.02)                  | 1.64 (0.67-3.97)                | 0.81 (0.18-3.57)                  |
|                                        | Usually    | 1.33 (0.54-3.27)                  | 2.13 (0.72-6.33)                | 0.72 (0.27-1.93)                  |
|                                        | Always     | 0.69 (0.28-1.69)                  | 0.93 (0.28-3.10)                | 0.54 (0.21-1.42)                  |
|                                        | Not Needed | 0.75 (0.38-1.48)                  | 0.72 (0.36-1.43)                | 0.76 (0.33-1.76)                  |

<sup>†</sup>Defined by AHRQ Quality Indicators, version 4.5, for overall, acute, and chronic H-ACSC; Columns represent multivariable logistic regression testing association with patient-reported access with 5 different primary care service types with overall, acute, and chronic H-ACSC; All models weighted to national VHA population in FY 2012; \*p<0.05, \*\*p<0.01, \*\*\*p<0.001

28  
 29  
 30

31 **Supplemental Table 4.4:** Association of experiences with 5 ways to access care in 2012 and  
 32 hospitalization due to Chronic Ambulatory Care Sensitive Condition (H-ACSC) in 2013 among Veterans  
 33 enrolled into Fee-for-service Medicare

|                                              |            | <b>Chronic H-ACSC<sup>†</sup></b><br>OR (95% CI) | <b>Age &gt; 65</b><br><b>Chronic H-ACSC<sup>†</sup></b><br>OR (95% CI) | <b>Age&gt;65 &amp;</b><br><b>Satisfaction</b><br><b>Chronic H-ACSC<sup>†</sup></b><br>OR (95% CI) |
|----------------------------------------------|------------|--------------------------------------------------|------------------------------------------------------------------------|---------------------------------------------------------------------------------------------------|
| <b>Routine care</b>                          | N =        | 56,160                                           | 29,803                                                                 | 29,243                                                                                            |
|                                              | Never      | <i>Ref</i>                                       | <i>Ref</i>                                                             | <i>Ref</i>                                                                                        |
|                                              | Sometimes  | 1.23 (0.75-2.00)                                 | 0.89 (0.48-1.66)                                                       | 0.89 (0.47-1.69)                                                                                  |
|                                              | Usually    | 1.25 (0.80-1.95)                                 | 1.03 (0.61-1.75)                                                       | 1.11 (0.63-1.96)                                                                                  |
|                                              | Always     | 1.04 (0.68-1.59)                                 | 0.83 (0.51-1.36)                                                       | 0.96 (0.55-1.68)                                                                                  |
|                                              | Not Needed | 1.12 (0.72-1.75)                                 | 0.85 (0.52-1.39)                                                       | 0.95 (0.56-1.61)                                                                                  |
| <b>Care by phone</b><br><b>Regular Hours</b> | N =        | 68,016                                           | 29,989                                                                 | 29,421                                                                                            |
|                                              | Never      | <i>Ref</i>                                       | <i>Ref</i>                                                             | <i>Ref</i>                                                                                        |
|                                              | Sometimes  | 1.54 (0.92-2.56)                                 | 1.22 (0.60-2.49)                                                       | 1.27 (0.63-2.52)                                                                                  |
|                                              | Usually    | 1.57 (1.05-2.35)*                                | 1.33 (0.85-2.09)                                                       | 1.39 (0.90-2.17)                                                                                  |
|                                              | Always     | 1.46 (0.97-2.19)                                 | 1.05 (0.67-1.65)                                                       | 1.23 (0.76-1.98)                                                                                  |
|                                              | Not Needed | 1.28 (0.88-1.85)                                 | 1.10 (0.72-1.68)                                                       | 1.24 (0.81-1.90)                                                                                  |
| <b>Immediate Care</b>                        | N =        | 56,477                                           | 29,961                                                                 | 29,366                                                                                            |
|                                              | Never      | <i>Ref</i>                                       | <i>Ref</i>                                                             | <i>Ref</i>                                                                                        |
|                                              | Sometimes  | 1.83 (1.03-3.18)*                                | 1.62 (0.77-3.41)                                                       | 1.59 (0.79-3.22)                                                                                  |
|                                              | Usually    | 1.25 (0.76-2.07)                                 | 1.42 (0.78-2.55)                                                       | 1.41 (0.79-2.51)                                                                                  |
|                                              | Always     | 1.05 (0.67-1.65)                                 | 0.95 (0.59-1.52)                                                       | 0.90 (0.55-1.49)                                                                                  |
|                                              | Not Needed | 1.06 (0.69-1.63)                                 | 1.06 (0.65-1.73)                                                       | 1.07 (0.64-1.77)                                                                                  |
| <b>After-hours Care</b>                      | N =        | 55,736                                           | 29,519                                                                 | 28,969                                                                                            |
|                                              | Never      | <i>Ref</i>                                       | <i>Ref</i>                                                             | <i>Ref</i>                                                                                        |
|                                              | Sometimes  | 0.74 (0.45-1.22)                                 | 0.58 (0.31-1.10)                                                       | 0.64 (0.34-1.19)                                                                                  |
|                                              | Usually    | 0.85 (0.56-1.30)                                 | 0.93 (0.54-1.59)                                                       | 0.92 (0.54-1.56)                                                                                  |
|                                              | Always     | <b>0.66 (0.46-0.96)*</b>                         | <b>0.57 (0.36-0.90)*</b>                                               | <b>0.55 (0.34-0.88)*</b>                                                                          |
|                                              | Not Needed | <b>0.53 (0.42-0.68)***</b>                       | <b>0.62 (0.47-0.81)***</b>                                             | <b>0.62 (0.48-0.80)***</b>                                                                        |
| <b>Care by Phone</b><br><b>Afterhours</b>    | N =        | 56,049                                           | 29,656                                                                 | 29,107                                                                                            |
|                                              | Never      | <i>Ref</i>                                       | <i>Ref</i>                                                             | <i>Ref</i>                                                                                        |
|                                              | Sometimes  | 0.81 (0.18-3.57)                                 | 1.04 (0.15-7.10)                                                       | 1.19 (0.18-7.97)                                                                                  |
|                                              | Usually    | 0.72 (0.27-1.93)                                 | 0.68 (0.17-2.72)                                                       | 0.76 (0.19-3.00)                                                                                  |
|                                              | Always     | 0.54 (0.21-1.42)                                 | 0.31 (0.07-1.32)                                                       | 0.38 (0.09-1.52)                                                                                  |
|                                              | Not Needed | 0.76 (0.33-1.76)                                 | 0.64 (0.18-2.23)                                                       | 0.71 (0.21-2.43)                                                                                  |

†Defined by AHRQ Quality Indicators, version 4.5, for overall, acute, and chronic H-ACSC; Columns represent multivariable logistic regression testing association with patient-reported access with 5 different primary care service types with overall, acute, and chronic H-ACSC; All models weighted to national VHA population in FY 2012; \*p<0.05, \*\*p<0.01, \*\*\*p<0.001

34

35

36 **Supplemental Table 5:** Experiences with obtaining Routine care and needing or seeking 4 other service  
 37 types within the Patient-Centered Medical Home

|                     |            | Needed or sought the following service type in last 12 months |                      |                      |                              |
|---------------------|------------|---------------------------------------------------------------|----------------------|----------------------|------------------------------|
|                     |            | Care by Phone<br>Regular Hours                                | Urgent Care          | After-Hours Care     | Care by Phone<br>After-hours |
|                     |            | OR (95% CI)                                                   | OR (95% CI)          | OR (95% CI)          | OR (95% CI)                  |
|                     | N =        | 66,307                                                        | 66,307               | 65,945               | 65,807                       |
| <b>Routine care</b> | Never      | <i>Ref</i>                                                    | <i>Ref</i>           | <i>Ref</i>           | <i>Ref</i>                   |
|                     | Sometimes  | 0.85 (0.69-1.05)                                              | 0.94 (0.78-1.14)     | 0.65 (0.54-0.78) *** | 1.10 (0.86-1.40)             |
|                     | Usually    | 0.61 (0.51-0.74) ***                                          | 0.64 (0.53-0.77) *** | 0.35 (0.29-0.41) *** | 0.67 (0.53-0.84) ***         |
|                     | Always     | 0.55 (0.46-0.65) ***                                          | 0.54 (0.45-1.64) *** | 0.23 (0.20-0.27) *** | 0.56 (0.46-0.70) ***         |
|                     | Not Needed | 0.27 (0.23-0.32) ***                                          | 0.25 (0.21-0.30) *** | 0.22 (0.18-0.26) *** | 0.29 (0.23-0.37) ***         |

Columns represent multivariable logistic regression testing association with patient-reported access with routine care and whether report seeking or needing 4 other service types; All models weighted to national VHA population in FY 2012; \*p<0.05, \*\*p<0.01, \*\*\*p<0.001

38

39



40 **Supplemental Table 6.1:** Likelihood of hospitalization for Any ACSC in subsequent year and experience  
 41 with accessing After-hours Care, stratified by access Routine Care.

|                         |            | <b>Hospitalization for any ACSC</b> |                               |
|-------------------------|------------|-------------------------------------|-------------------------------|
|                         |            | Access to Routine Care              |                               |
|                         |            | “Always”                            | “Usually / Sometimes / Never” |
|                         |            | OR (95% CI)                         | OR (95% CI)                   |
| <b>After-hours Care</b> | N =        | 29,102                              | 21,364                        |
|                         | Never      | <i>Ref</i>                          | <i>Ref</i>                    |
|                         | Sometimes  | 1.01 (0.43-2.37)                    | 0.68 (0.44-1.06)              |
|                         | Usually    | 1.91 (1.06-3.47) *                  | 0.58 (0.34-0.97) *            |
|                         | Always     | 0.87 (0.55-1.37)                    | 1.96 (0.93-4.15)              |
|                         | Not Needed | 0.67 (0.48-0.92) *                  | 0.58 (0.45-0.77) ***          |

Columns represent multivariable logistic regression testing association of patient-reported access to after-hours care and hospitalization for any ACSC, stratified by experiences with accessing with routine care; All models weighted to national VHA population in FY 2012; \*p<0.05, \*\*p<0.01, \*\*\*p<0.001

42

43

44 **Supplemental Table 6.2:** Likelihood of hospitalization for Acute and Chronic ACSCs in subsequent year  
 45 based upon experience with accessing After-hours Care, stratified by access Routine Care.

|                         |            | <b>Acute ACSC</b> |                               | <b>Chronic ACSC</b>        |                               |
|-------------------------|------------|-------------------|-------------------------------|----------------------------|-------------------------------|
|                         |            | Routine Care      |                               | Routine Care               |                               |
|                         |            | “Always”          | “Usually / Sometimes / Never” | “Always”                   | “Usually / Sometimes / Never” |
|                         |            | OR (95% CI)       | OR (95% CI)                   | OR (95% CI)                | OR (95% CI)                   |
| <b>After-hours Care</b> | N =        | 29,102            | 21,174                        | 29,102                     | 21,364                        |
|                         | Never      | <i>Ref</i>        | <i>Ref</i>                    | <i>Ref</i>                 | <i>Ref</i>                    |
|                         | Sometimes  | 0.88 (0.24-3.20)  | 0.67 (0.29-1.56)              | 0.65 (0.54-0.78)           | 0.69 (0.41-1.16)              |
|                         | Usually    | 1.09 (0.44-2.70)  | 0.75 (0.38-1.48)              | <b>2.46 (1.29-4.71) **</b> | <b>0.50 (0.26-0.96) *</b>     |
|                         | Always     | 1.05 (0.47-2.38)  | <b>3.63 (1.33-3.89) *</b>     | 0.73 (0.46-1.16)           | 1.11 (0.54-2.26)              |
|                         | Not Needed | 0.65 (0.41-1.03)  | 0.80 (0.54-1.17) ***          | 0.63 (0.43-0.91) *         | 0.51 (0.36-0.72) ***          |

Columns represent multivariable logistic regression testing association of patient-reported access to after-hours care and hospitalization for acute and chronic ACSCs, stratified by experiences accessing with routine care; All models weighted to national VHA population in FY 2012; \*p<0.05, \*\*p<0.01, \*\*\*p<0.001

46

47

48 **Supplemental Table 6.3:** Hospitalization for Overall, Acute, and Chronic ACSCs comparing patients who  
 49 experience less than optimal access Routine Care and better access to After-Hours Care

|                                                                 |            | Hospitalization for ACSC   |                   |                            |
|-----------------------------------------------------------------|------------|----------------------------|-------------------|----------------------------|
|                                                                 |            | Overall                    | Acute             | Chronic                    |
|                                                                 |            | OR (95% CI)                | OR (95% CI)       | OR (95% CI)                |
| Interaction                                                     | N =        | 50,466                     | 66,307            | 65,945                     |
| <b>Not always receiving Routine Care *<br/>After-hours Care</b> | Never      | <i>Ref</i>                 | <i>Ref</i>        | <i>Ref</i>                 |
|                                                                 | Sometimes  | 0.59 (0.22-1.54)           | 0.61 (0.14-2.65)  | 0.53 (0.18-1.61)           |
|                                                                 | Usually    | <b>0.29 (0.13-0.66) **</b> | 0.60 (0.21-1.70)  | <b>0.22 (0.08-0.58) **</b> |
|                                                                 | Always     | 2.38 (0.94-6.00)           | 3.40 (0.85-13.64) | 1.65 (0.75-3.62)           |
|                                                                 | Not Needed | 0.83 (0.54-1.26)           | 1.14 (0.63-2.05)  | 0.77 (0.47-1.26) *         |

Columns represent multivariable logistic regression testing the interaction of patient-reported access with after-hours care comparing patients 'usually / sometimes / never' (not always) vs. 'always' receiving routine care and likelihood for any hospitalization for overall, acute, and chronic ACSCs; All models weighted to national VHA population in FY 2012; \*p<0.05, \*\*p<0.01, \*\*\*p<0.001

50

51

52
